# Supplementary material
Source: PubMed Central journal article supplement (PMC11027825)
Supplement: 262_2019_2442_MOESM1_ESM.pdf [file 262_2019_2442_MOESM1_ESM.pdf]

Supplementary Table S1: Simulation results for Scenario 1. This table reports the true DLT probability at each combination, the true RSP probability at each combination, the percentage of trials in which each combination was recommended as the optimal combination, and the average number of participants treated in a simulated study. The true OBD and OBA are indicated in italicized bold type.

| <b>Cohort 1</b>                                                                                                |           |            |            |                |              |
|----------------------------------------------------------------------------------------------------------------|-----------|------------|------------|----------------|--------------|
|                                                                                                                | CD40      | Truth      |            | %OBD Selection | Average #pts |
|                                                                                                                |           | %DLT       | %RSP       |                |              |
| CD27 (-)<br>Group A                                                                                            | 50        | 5%         | 50%        | 10%            | 5.48         |
|                                                                                                                | 200       | 10%        | 60%        | 15%            | 5.98         |
|                                                                                                                | 600       | <b>15%</b> | <b>75%</b> | <b>39%</b>     | <b>8.99</b>  |
|                                                                                                                | 1200      | 20%        | 75%        | 36%            | 7.33         |
| CD27 (+)<br>Group B                                                                                            | 50        | 10%        | 50%        | 11%            | 5.64         |
|                                                                                                                | 200       | 15%        | 60%        | 13%            | 5.81         |
|                                                                                                                | 600       | <b>20%</b> | <b>80%</b> | <b>45%</b>     | <b>9.80</b>  |
|                                                                                                                | 1500      | 25%        | 80%        | 35%            | 7.12         |
| Average trial size: Group A = 28.16; Group B = 28.40.<br>Overall DLT rate: 15.8%; Overall response rate: 69.1% |           |            |            |                |              |
| <b>Cohort 2</b>                                                                                                |           |            |            |                |              |
|                                                                                                                | Mel12.1 + | Truth      |            | %OBA Selection | Average #pts |
|                                                                                                                |           | %DLT       | %RSP       |                |              |
| CD27 (-)<br>Group C                                                                                            | IFA       | 5%         | 50%        | 20%            | 5.68         |
|                                                                                                                | Poly      | 5%         | 50%        | 23%            | 5.71         |
|                                                                                                                | Poly+IFA  | <b>10%</b> | <b>65%</b> | <b>57%</b>     | <b>8.63</b>  |
| CD27 (+)<br>Group D                                                                                            | IFA       | 10%        | 55%        | 21%            | 5.76         |
|                                                                                                                | Poly      | 10%        | 60%        | 26%            | 6.10         |
|                                                                                                                | Poly+IFA  | <b>15%</b> | <b>70%</b> | <b>53%</b>     | <b>8.04</b>  |
| Average trial size: Group C = 20.02; Group D = 19.90<br>Overall DLT rate: 9.6%; Overall response rate: 59.8%   |           |            |            |                |              |

Supplementary Table S2: Simulation results for Scenario 2. This table reports the true DLT probability at each combination, the true RSP probability at each combination, the percentage of trials in which each combination was recommended as the optimal combination, and the average number of participants treated in a simulated study. The true OBD and OBA are indicated in italicized bold type.

| <b>Cohort 1</b>                                                                                               |          |            |            |                |              |
|---------------------------------------------------------------------------------------------------------------|----------|------------|------------|----------------|--------------|
|                                                                                                               | CD40     | Truth      |            | %OBD Selection | Average #pts |
|                                                                                                               |          | %DLT       | %RSP       |                |              |
| CD27 (-)<br>Group A                                                                                           | 50       | 10%        | 60%        | 15%            | 6.26         |
|                                                                                                               | 200      | 15%        | 80%        | 42%            | 9.37         |
|                                                                                                               | 600      | <b>25%</b> | <b>80%</b> | <b>24%</b>     | <b>6.70</b>  |
|                                                                                                               | 1200     | 35%        | 85%        | 20%            | 5.17         |
| CD27 (+)<br>Group B                                                                                           | 50       | 15%        | 65%        | 11%            | 8.01         |
|                                                                                                               | 200      | 20%        | 85%        | 14%            | 9.98         |
|                                                                                                               | 600      | <b>30%</b> | <b>90%</b> | <b>43%</b>     | <b>6.82</b>  |
|                                                                                                               | 1200     | 40%        | 90%        | 21%            | 2.85         |
| Average trial size: Group A = 27.49; Group B = 27.68<br>Overall DLT rate: 21.6%; Overall response rate: 78.6% |          |            |            |                |              |
| <b>Cohorts 2 &amp; 3</b>                                                                                      |          |            |            |                |              |
|                                                                                                               |          | Truth      |            | %OBA Selection | Average #pts |
|                                                                                                               |          | %DLT       | %RSP       |                |              |
| CD27 (-)<br>Group C                                                                                           | IFA      | 1%         | 50%        | 14%            | 4.94         |
|                                                                                                               | Poly     | 8%         | 50%        | 13%            | 4.89         |
|                                                                                                               | Poly+IFA | <b>15%</b> | <b>75%</b> | <b>73%</b>     | <b>10.09</b> |
| CD27 (+)<br>Group D                                                                                           | IFA      | 5%         | 60%        | 14%            | 5.13         |
|                                                                                                               | Poly     | 10%        | 65%        | 20%            | 5.75         |
|                                                                                                               | Poly+IFA | <b>20%</b> | <b>80%</b> | <b>66%</b>     | <b>9.13</b>  |
| Average trial size: Group C = 20.01; Group D = 19.92<br>Overall DLT rate: 11.5%; Overall response rate: 66.9% |          |            |            |                |              |

Supplementary Table S3: Simulation results for Scenario 3. This table reports the true DLT probability at each combination, the true RSP probability at each combination, the percentage of trials in which each combination was recommended as the optimal combination, and the average number of participants treated in a simulated study. The true OBD and OBA are indicated in italicized bold type.

| <b>Cohort 1</b>                                                                                               |          |            |            |                |              |
|---------------------------------------------------------------------------------------------------------------|----------|------------|------------|----------------|--------------|
|                                                                                                               | CD40     | Truth      |            | %OBD Selection | Average #pts |
|                                                                                                               |          | %DLT       | %RSP       |                |              |
| CD27 (-)<br>Group A                                                                                           | 50       | 11%        | 60%        | 25%            | 7.67         |
|                                                                                                               | 200      | <b>20%</b> | <b>80%</b> | <b>54%</b>     | <b>10.54</b> |
|                                                                                                               | 600      | 35%        | 80%        | 15%            | 5.34         |
|                                                                                                               | 1200     | 45%        | 85%        | 6%             | 2.86         |
| CD27 (+)<br>Group B                                                                                           | 50       | 12%        | 65%        | 31%            | 9.39         |
|                                                                                                               | 600      | <b>22%</b> | <b>85%</b> | <b>50%</b>     | <b>10.20</b> |
|                                                                                                               | 500      | 36%        | 90%        | 17%            | 4.84         |
|                                                                                                               | 1200     | 50%        | 90%        | 2%             | 1.58         |
| Average trial size: Group A = 26.39; Group B = 26.03<br>Overall DLT rate: 23.3%; Overall response rate: 76.9% |          |            |            |                |              |
| <b>Cohorts 2 &amp; 3</b>                                                                                      |          |            |            |                |              |
|                                                                                                               |          | Truth      |            | %OBA Selection | Average #pts |
|                                                                                                               |          | %DLT       | %RSP       |                |              |
| CD27 (-)<br>Group C                                                                                           | IFA      | 1%         | 50%        | 14%            | 4.84         |
|                                                                                                               | Poly     | 8%         | 50%        | 17%            | 5.29         |
|                                                                                                               | Poly+IFA | <b>15%</b> | <b>75%</b> | <b>70%</b>     | <b>9.80</b>  |
| CD27 (+)<br>Group D                                                                                           | IFA      | <b>25%</b> | <b>60%</b> | <b>52%</b>     | <b>9.64</b>  |
|                                                                                                               | Poly     | 40%        | 65%        | 27%            | 5.46         |
|                                                                                                               | Poly+IFA | 50%        | 80%        | 21%            | 4.81         |
| Average trial size: Group C = 19.93; Group D = 19.91<br>Overall DLT rate: 22.1%; Overall response rate: 64.2% |          |            |            |                |              |

Supplementary Table S4: Simulation results for Scenario 4. This table reports the true DLT probability at each combination, the true RSP probability at each combination, the percentage of trials in which each combination was recommended as the optimal combination, and the average number of participants treated in a simulated study. The true OBD and OBA are indicated in italicized bold type.

| <b>Cohort 1</b>                                                                                               |          |            |            |                |              |
|---------------------------------------------------------------------------------------------------------------|----------|------------|------------|----------------|--------------|
|                                                                                                               | CD40     | Truth      |            | %OBD Selection | Average #pts |
|                                                                                                               |          | %DLT       | %RSP       |                |              |
| CD27 (-)<br>Group A                                                                                           | 50       | 10%        | 50%        | 26%            | 7.69         |
|                                                                                                               | 200      | 15%        | 55%        | 21%            | 6.62         |
|                                                                                                               | 600      | <b>25%</b> | <b>60%</b> | <b>36%</b>     | <b>7.92</b>  |
|                                                                                                               | 1200     | 35%        | 75%        | 16%            | 4.77         |
| CD27 (+)<br>Group B                                                                                           | 50       | 15%        | 55%        | 36%            | 10.19        |
|                                                                                                               | 200      | 20%        | 60%        | 28%            | 7.50         |
|                                                                                                               | 600      | 30%        | 75%        | 28%            | 6.36         |
|                                                                                                               | 1200     | 40%        | 75%        | 8%             | 2.82         |
| Average trial size: Group A = 26.97; Group B = 26.90<br>Overall DLT rate: 21.5%; Overall response rate: 64.5% |          |            |            |                |              |
| <b>Cohorts 2 &amp; 3</b>                                                                                      |          |            |            |                |              |
|                                                                                                               |          | Truth      |            | %OBA Selection | Average #pts |
|                                                                                                               |          | %DLT       | %RSP       |                |              |
| CD27 (-)<br>Group C                                                                                           | IFA      | 5%         | 50%        | 21%            | 5.84         |
|                                                                                                               | Poly     | 5%         | 50%        | 24%            | 5.6          |
|                                                                                                               | Poly+IFA | <b>10%</b> | <b>65%</b> | <b>56%</b>     | <b>8.47</b>  |
| CD27 (+)<br>Group D                                                                                           | IFA      | 10%        | 50%        | 20%            | 5.98         |
|                                                                                                               | Poly     | 10%        | 50%        | 23%            | 5.51         |
|                                                                                                               | Poly+IFA | <b>15%</b> | <b>65%</b> | <b>57%</b>     | <b>8.51</b>  |
| Average trial size: Group C = 19.91; Group D = 20.00<br>Overall DLT rate: 9.5%; Overall response rate: 56.3%  |          |            |            |                |              |
